# Supplementary material
Source: Springer Nature journal article supplement (https://www.springermedizin.de/resource/supplementary/12936_2003_49_MOESM2_ESM.pdf/9546756)

**(A)**

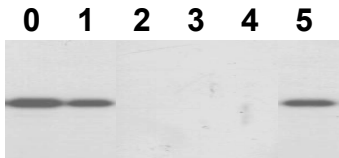

**(B)**

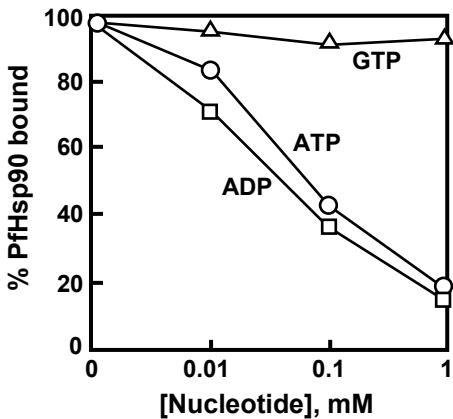

Supplement: MOESM2 [file 9546756]
